# Supplementary material for: Understanding the role of solvents in bottom-up synthesis of multi-element hydroxides
Source: Royal Society of Chemistry journal article supplement (doi:10.1039/d3ra07344k), 2024-01-01
Supplement: d3ra07344k1.pdf [file d3ra07344k1.pdf]

## Supporting information

### Understanding the Role of Solvents in Bottom-Up Synthesis of Multi-Element Hydroxides

Fei Li<sup>1,\*</sup>, Kanako Yoshida<sup>1</sup>, Nguyen Van Chuc<sup>2</sup>, Minoru Osada<sup>3</sup>, Hiroya Abe<sup>1,\*</sup>

<sup>1</sup> Joining and Welding Research Institute, Osaka University, Osaka 5670047, Japan

<sup>2</sup> Institute of Materials Science, Vietnam Academy of Science and Technology, Hanoi, Vietnam

<sup>3</sup> Institute of Materials and Systems for Sustainability, Nagoya University, Nagoya 4648603, Japan

\* feili@jwri.osaka-u.ac.jp (F. Li), h-abe@jwri.osaka-u.ac.jp (H. Abe)

Table S1 Solubility product constants

| Formula             | $K_{sp}$ |
|---------------------|----------|
| Mg(OH) <sub>2</sub> | 5.61e-12 |
| Al(OH) <sub>3</sub> | 1.3e-33  |
| Fe(OH) <sub>3</sub> | 2.79e-39 |
| Zn(OH) <sub>2</sub> | 3e-17    |

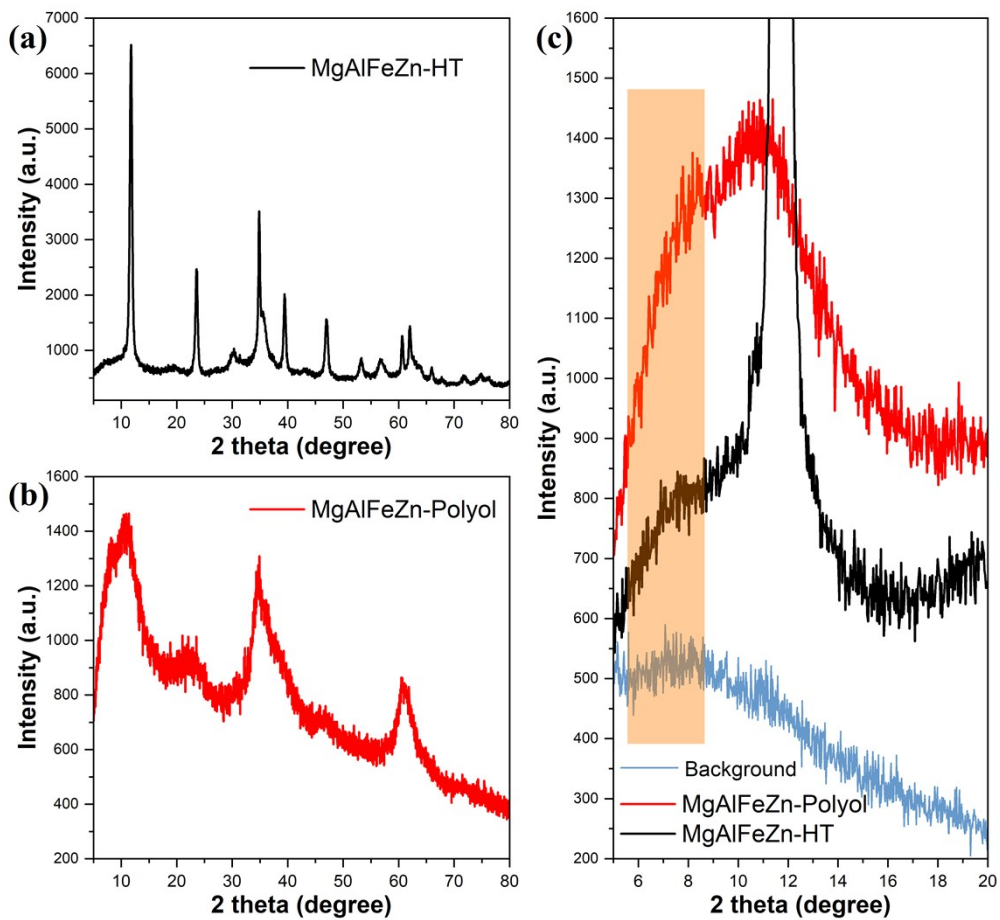

Fig. S1 XRD patterns of the (a) hydrothermal- and (b) polyol-derived MgAlFeZn hydroxides. (c) Expanded view of the MgAlFeZn hydroxides and the blank sample holder.

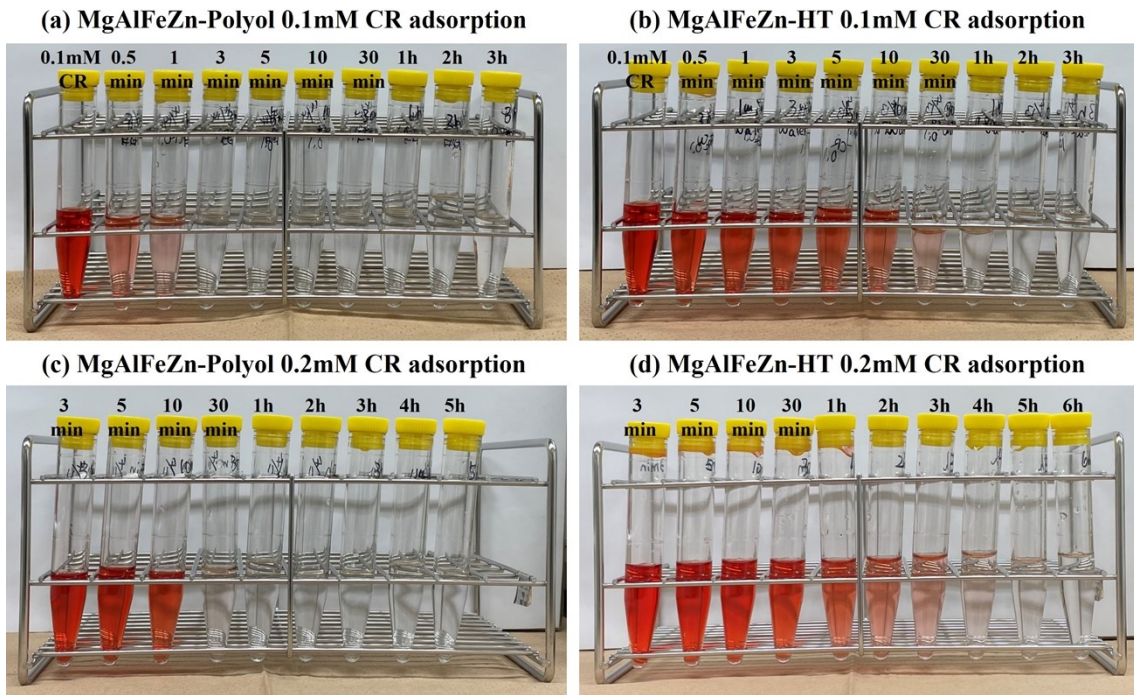

Fig. S2 Photographs of the CR aqueous solutions in adsorption kinetics study.

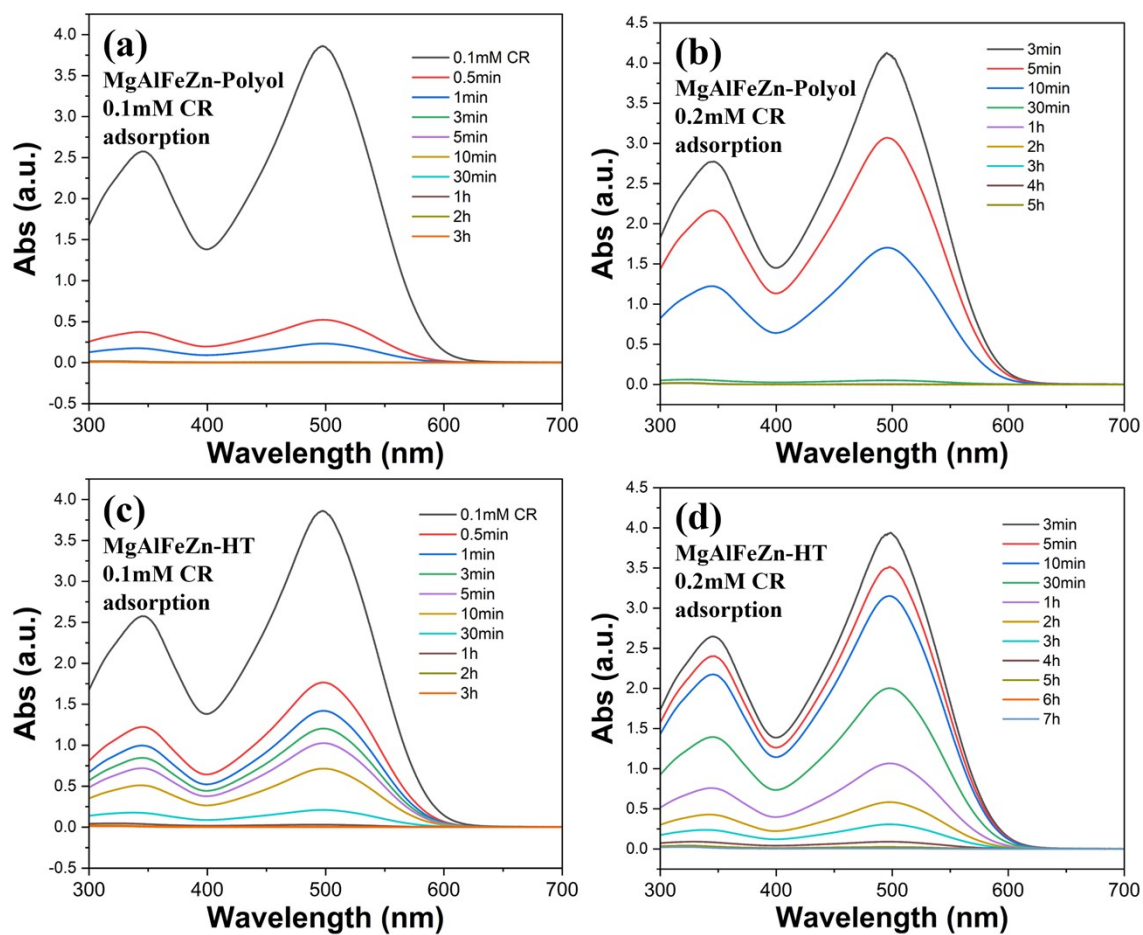

Fig. S3 UV-vis spectra of the CR aqueous solution in adsorption kinetics study.

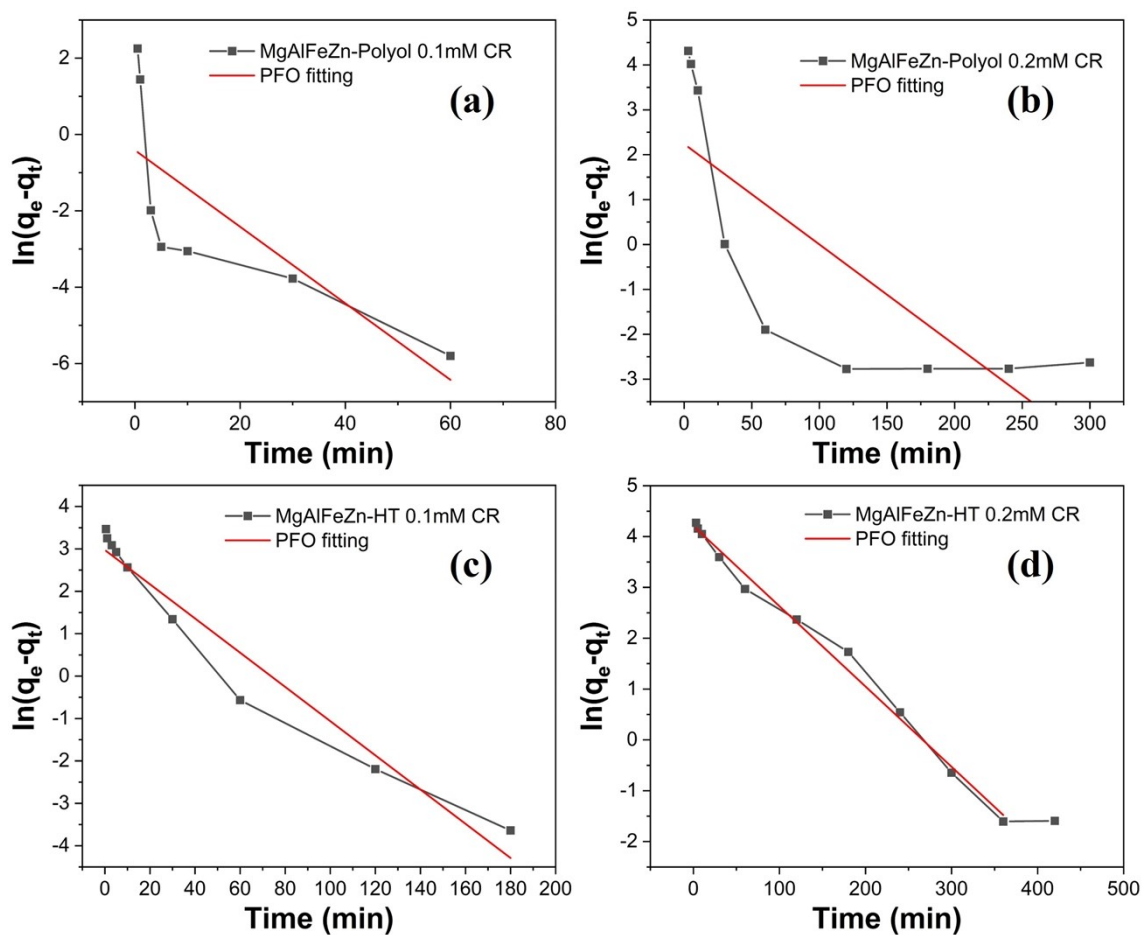

Fig. S4 Pseudo-first-order (PFO) model fitted curves for CR adsorption onto the MgAlFeZn-Polyol and MgAlFeZn-HT hydroxides.

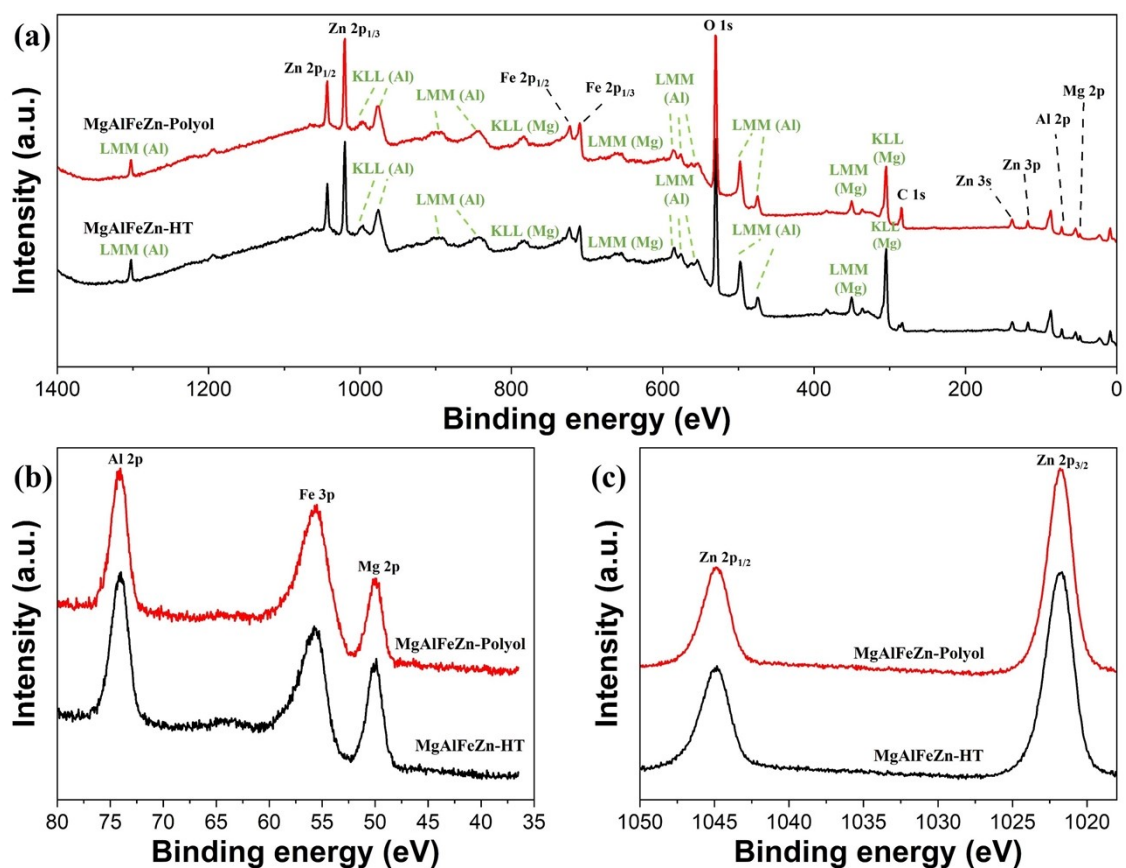

Fig. S5 (a) XPS survey spectra of the MgAlFeZn-Polyol and MgAlFeZn-HT. The green labels indicate the Auger peaks of the corresponding elements. (b) Al 2p, Fe 3p and Mg 2p spectra of the MgAlFeZn-Polyol and MgAlFeZn-HT. (c) Zn 2p spectra of the MgAlFeZn-Polyol and MgAlFeZn-HT

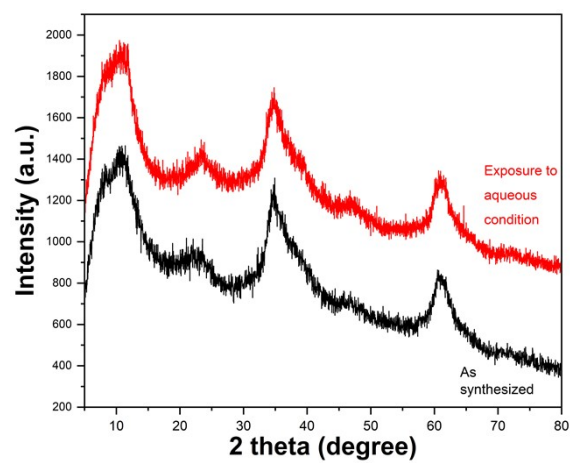

Fig. S6. XRD patterns of MgAlFeZn-Polyol as synthesized powders and after exposure to aqueous conditions.
